# Supplementary material for: High Indirect Energy Consumption in AEM-Based CO2 Electrolyzers Demonstrates the Potential of Bipolar Membranes
Source: PubMed Central journal article supplement — ACS Appl Mater Interfaces. 2021 Dec 20;14(1):557–63. doi: 10.1021/acsami.1c16513 (PMC8762646; doi:10.1021/acsami.1c16513), 2021-12-20
Supplement: am1c16513_si_001.pdf [file am1c16513_si_001.pdf]

# Supporting information

for

## **High indirect energy consumption in AEM-based CO<sub>2</sub> electrolyzers demonstrates the potential of bipolar membranes**

Marijn A. Blommaert<sup>1</sup>, Siddhartha Subramanian<sup>1</sup>, Kailun Yang<sup>1</sup>, Wilson A. Smith<sup>1</sup> & David A. Vermaas<sup>1\*</sup>

<sup>1</sup>Department of Chemical Engineering, Delft University of Technology, 2629 HZ Delft, The Netherlands

\* Corresponding author. Email: [d.a.vermaas@tudelft.nl](mailto:d.a.vermaas@tudelft.nl)

## Electrochemical setup

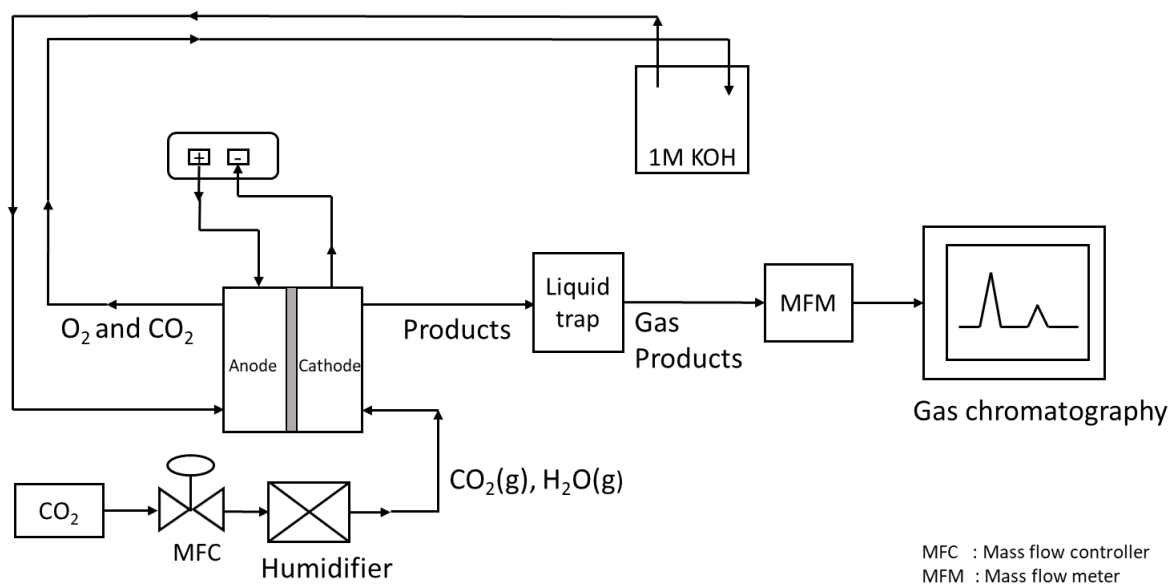

Figure S1: System design for CO<sub>2</sub> electro reduction.

pH for electrochemical experiments at 300 mA cm<sup>-2</sup>

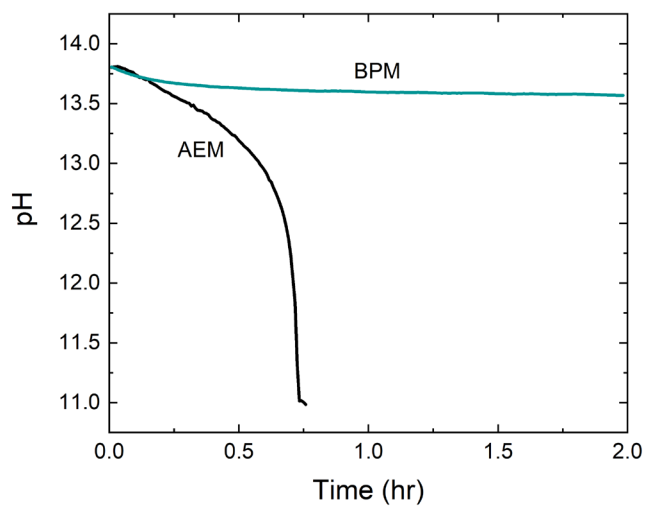

Figure S2: pH of the AEM- and BPM-based cell.

Table S1: Literature comparison of MEA-cells with Ag as cathodic catalyst with an AEM as membrane. Single pass conversion is defined as the ratio of CO<sub>2</sub> converted into CO vs inlet flow rate CO<sub>2</sub>. CO<sub>2</sub> utilization is defined as the ratio of CO<sub>2</sub> converted into CO vs the total CO<sub>2</sub> consumed.

| CO <sub>2</sub> inlet flow rate (sccm) | Current density (mA/cm <sup>2</sup> ) | Faradaic efficiency to CO (%) | Single pass conversion (%) | CO <sub>2</sub> utilization (%) | Membrane used     | Reference                      |
|----------------------------------------|---------------------------------------|-------------------------------|----------------------------|---------------------------------|-------------------|--------------------------------|
| 100                                    | 100                                   | 100                           | -                          | 50                              | Sustainion X37-50 | Larrazabal et. al <sup>1</sup> |
|                                        | 300                                   | 50                            | -                          | 40                              |                   |                                |
| 30                                     | 100                                   | -                             | 38                         | -                               | Sustainion X37-50 | Jeng et. al <sup>2</sup>       |
| 120                                    | 100                                   | -                             | 10                         | -                               |                   |                                |
|                                        | 300                                   | -                             | 20                         | -                               |                   |                                |
| 100                                    | 100                                   | 84                            | 2                          | -                               | Sustainion X37-50 | Wheeler et. al <sup>3</sup>    |
| 40                                     | 100                                   | 90                            | 10.5                       | 40                              | Sustainion X37-50 | This work                      |
|                                        | 300                                   | 40                            | 14                         | 25                              |                   |                                |

## Calculation of Faradaic efficiency

To estimate the Faradaic efficiency of gaseous products, the mole fractions of CO and H<sub>2</sub> were estimated from GC injections. The volume fraction of gas products from GC is equal to the mole fraction for ideal gases. Since the sum of mole fractions is equal to 1, the mole fraction of CO<sub>2</sub> exiting was calculated as,

$$x_{CO_2,out} = 1 - (x_{CO} + x_{H_2}) \quad (S1)$$

After calculating the mole fractions of all gaseous products, the volumetric flow rate at the outlet of the reactor measured with the MFM and used to calculate the moles of each product.

$$n_{CO} = \frac{P\dot{V}_{outlet} \times x_{CO}}{RT} \quad (S2)$$

$$n_{H_2} = \frac{P\dot{V}_{outlet} \times x_{H_2}}{RT} \quad (S3)$$

$$FE_{CO} = \frac{n_{CO} \times n^e \times F}{I} \times 100 \% \quad (S4)$$

$$FE_{H_2} = \frac{n_{H_2} \times n^e \times F}{I} \times 100 \% \quad (S5)$$

Here:  $n_{CO}$  is moles  $s^{-1}$  of CO produced,  $n^e$  number of electrons involved in  $CO_2RR$  (2 for CO),  $F$  is Faradays constant  $96485 \text{ C mol}^{-1}$  and  $I$  applied current (in Amperes).

As an example, the Faradaic efficiencies of the experiments with 1M KOH, Sustanion at  $100 \text{ mA cm}^{-2}$  are added in Fig. S3:

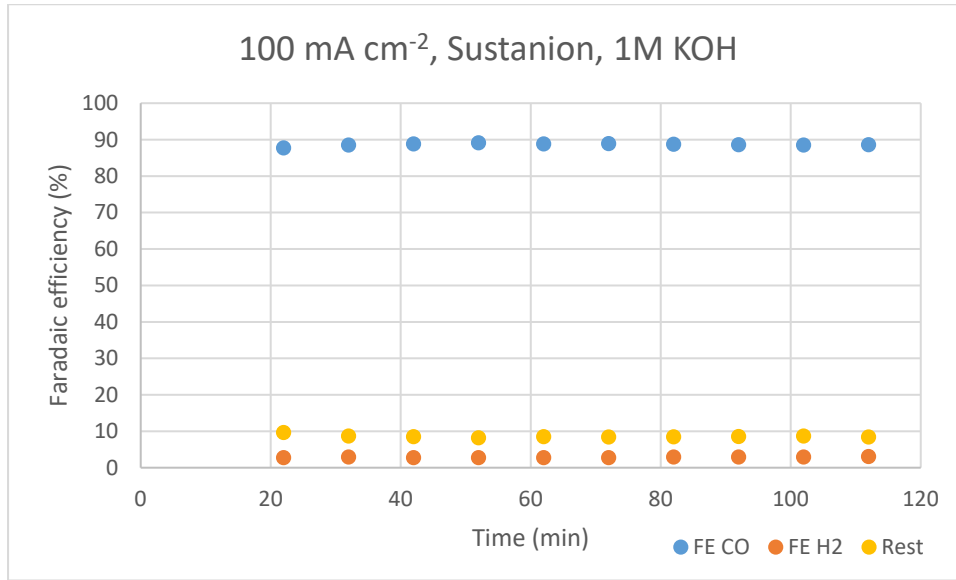

Figure S3: Faradaic efficiencies of experiment with 1M KOH, Sustanion at  $100 \text{ mA cm}^{-2}$ .

## Outlet flowrate measurements

The gas flowrate at the exit of the reactor was measured continuously during electrolysis as shown in Fig S4. The FE of CO and  $H_2$  was then calculated using Eq. S4 and Eq. S5.

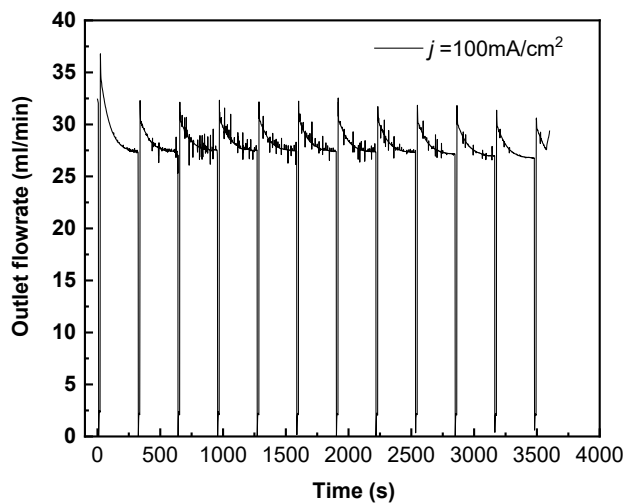

Figure S4: Outlet gas flowrate measured during electrolysis at a current density of  $100 \text{ mA cm}^{-2}$  (shown for the first hour of the experiment). The drop in flowrate every 5 min are due to the periodic GC injections.
